# Supplementary material for: Tb-doped iron oxide: bifunctional fluorescent and magnetic nanocrystals
Source: Royal Society of Chemistry journal article supplement (doi:10.1039/b817159a), 2009-01-01
Supplement: b817159a.pdf [file b817159a.pdf]

## Supplementary Information

### Tb-doped Iron Oxide: Bifunctional Fluorescent and Magnetic Nanocrystals

Yunxia Zhang,<sup>†</sup> Gautom Kumar Das,<sup>†</sup> Rong Xu\* and Timothy Thatt Yang Tan\*

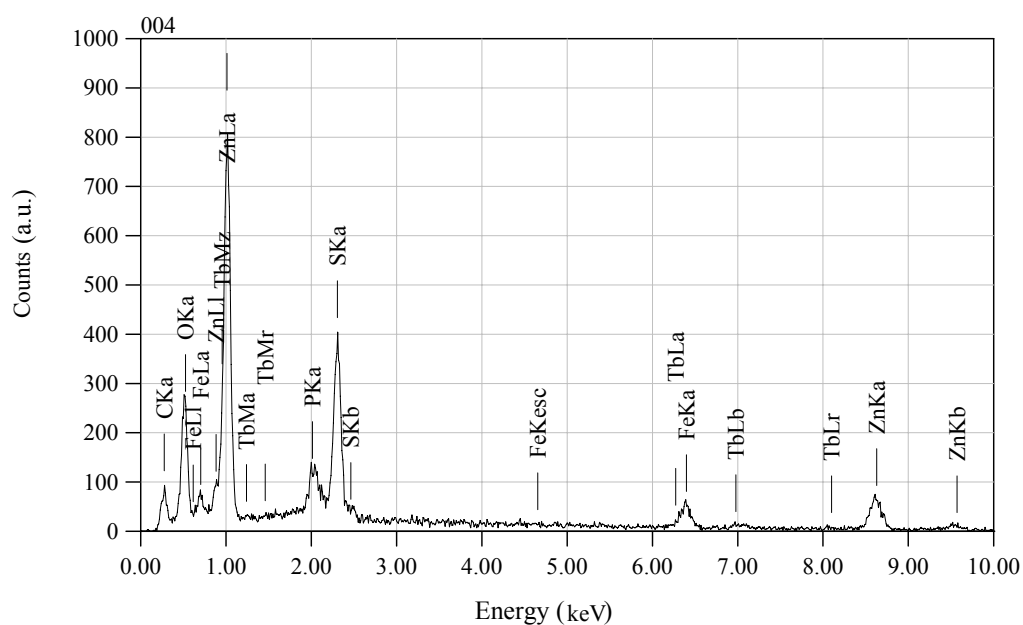

**Fig. S1** Energy dispersive X-ray spectroscopy (EDS) analysis of ZnS coated Tb-doped  $\gamma$ -Fe<sub>2</sub>O<sub>3</sub> nanocrystals.

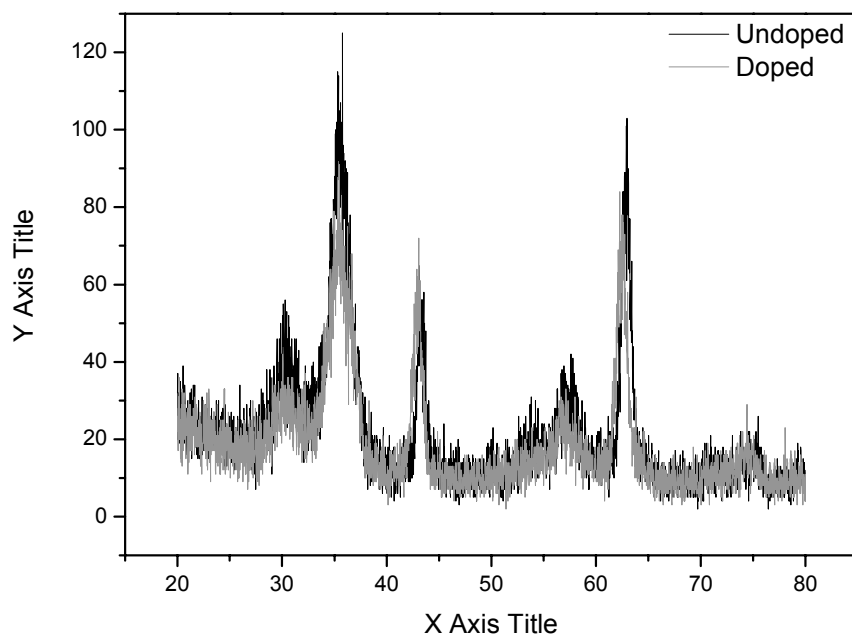

**Fig. S2** XRD pattern of undoped and doped iron oxide nanocrystals.

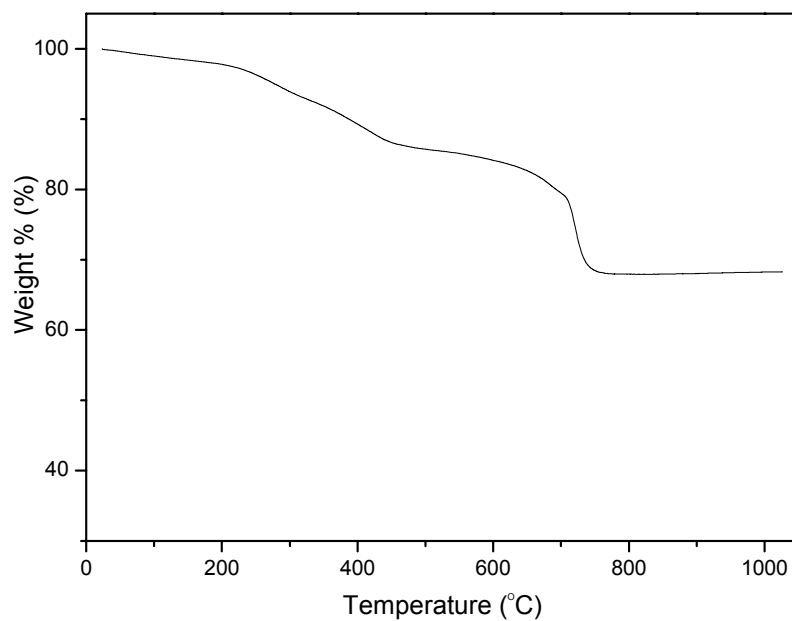

**Fig. S3.** Percentage weight loss of the as-prepared Tb-doped iron oxide nanocrystal using TGA method in N<sub>2</sub> with a heating rate of 10 °C/min.
